# Supplementary material
Source: PubMed Central journal article supplement (PMC3369701)
Supplement: Supp_Data.pdf [file Supp_Data.pdf]

## Supplementary Data

SUPPLEMENTARY TABLE S1. PCR PRIMERS USED FOR THE CHARACTERIZATION OF BUFFALO EMBRYONIC STEM CELLS (REVERSE TRANSCRIPTASE PCR)

| <i>Gene</i>         | <i>Sequence</i>                                                 | <i>Annealing temperature</i> | <i>Base pairs (bp)</i> | <i>Accession no.</i> |
|---------------------|-----------------------------------------------------------------|------------------------------|------------------------|----------------------|
| <i>OCT4</i>         | F, 5'-CGCCCTATGACTTGTGTGGA-3'<br>R, 5'-TCGGCTCCAGCTTCTCCT T-3'  | 58                           | 201                    | GU997625.1           |
| <i>SOX2</i>         | F, 5'-ATGGGCTCGGTGGTGAAGT-3'<br>R, 5'-GCTCTGGTAGTGCTGGGACA-3'   | 59                           | 183                    | GQ853881.1           |
| <i>NANOG</i>        | F, 5'-CCGAAGCATCCAACCTAGG-3'<br>R, 5'-GAGACAGTGTCCGTGTCGAG-3'   | 60                           | 100                    | NM_001025344.1       |
| <i>C-MYC</i>        | F, 5'-CTCCTCACAGCCCGTTAGTC-3'<br>R, 5'-ATTGCGGTTGTTGCCTATC-3'   | 53                           | 156                    | GU296437.1           |
| <i>REX-1</i>        | F, 5'-CAGCTGCCATAGGCTCTACC-3'<br>R, 5'-GTCTGGCCTGACAAAGGTGT-3'  | 55                           | 239                    | XM_001255545         |
| <i>NUCLEOSTEMIN</i> | F, 5'-AGAATCGGATGAGCTGTTGG-3'<br>R, 5'-ATCAGCATTGCCAGAGAGGT-3'  | 60                           | 400                    | NM_001034307.1       |
| <i>STAT3</i>        | F, 5'-GCGAAGAATCAAGCAGTCC-3'<br>R, 5'-CCAGGGCAGTAAGCATCTGT-3'   | 60                           | 383                    | DQ487026             |
| <i>FOXD3</i>        | F, 5'-CTATTCGTACATCGCGCTCA-3'<br>R, 5'-GGGTCCAGGGTCCAGTAGTT-3'  | 58                           | 228                    | ENSBTAG00000008501   |
| <i>TELOMERASE</i>   | F- 5'-GACTTCCAGCCGTACCTGAG-3'<br>R- 5'- GATCCCCTGACACTGGATGT-3' | 58                           | 192                    | NM_001046242.1       |

F, forward; R, reverse; RT-PCR, reverse transcriptase polymerase chain reaction.

SUPPLEMENTARY TABLE S2. PCR PRIMERS USED FOR THE CHARACTERIZATION OF EMBRYOID BODIES

| <i>Gene</i>          | <i>Sequence</i>                                                  | <i>Annealing temperature</i> | <i>Base pairs (bp)</i> | <i>Accession no.</i>           |
|----------------------|------------------------------------------------------------------|------------------------------|------------------------|--------------------------------|
| <b>1. Ectoderm</b>   |                                                                  |                              |                        |                                |
| <i>NF-68</i>         | F, 5'-AGGAAGATGCTGAGGAAGCA-3'<br>R, 5'-GTTGACCTGATTTCCGGGAGA-3'  | 60                           | 183                    | NM174121                       |
| <i>CYTOKERATIN-8</i> | F, 5'-GTCTCCAGGCTGAGATCGAG-3'<br>R, 5'-TCCAGCAGCTTCCTGTAGGT-3'   | 58                           | 241                    | BC103339.1                     |
| <b>2. Mesoderm</b>   |                                                                  |                              |                        |                                |
| <i>ASA</i>           | F, 5'-GGCATCATCACCAACTGGGA-3'<br>R, 5'-TTGCCGATGGTGATGACCTG-3'   | 55                           | 536                    | Sritanaudo-mchai et al. (2007) |
| <i>BMP-4</i>         | F, 5'-GGTAACCGAATGCTGATGGT-3'<br>R, 5'-CTGGGATGTTCTCCAGATGT-3'   | 55                           | 385                    | NM001045877.1                  |
| <i>MSX1</i>          | F, 5'- GGACTCCTCAAACCTGCCAGA-3'<br>R, 5'-TACTGCTTCTGGCGGAACCT-3' | 58                           | 224                    | NM_174798                      |
| <b>3. Endoderm</b>   |                                                                  |                              |                        |                                |
| <i>AFP</i>           | F, 5'-TCTTCCCCATGTTCTTCAGG-3'<br>R, 5'-TTTCACGGCAAATTTCTTCC-3'   | 55                           | 205                    | NM_001034262                   |
| <i>HNF4</i>          | F, 5'-ACATCCCAGCCTTCTGTGAG-3'<br>R, 5'-TCGTCAATCTGCAGCTCTTG-3'   | 58                           | 238                    | AF250028                       |
| <i>GATA4</i>         | F, 5'-CGGAAAGAGGGGATTCAAAC-3'<br>R, 5'-ATCTCCTCACTGCTGCTGGT-3'   | 58                           | 152                    | DQ487031                       |

PCR, polymerase chain reaction; F, forward; R, reverse.

SUPPLEMENTARY TABLE S3. BUFFALO-SPECIFIC REAL-TIME PRIMERS

| <i>Gene</i> | <i>Sequence</i>                                                   | <i>Annealing temperature</i> | <i>Base pairs (bp)</i> | <i>Accession no.</i> |
|-------------|-------------------------------------------------------------------|------------------------------|------------------------|----------------------|
| SOX2        | F, 5'-CGTGGTTACCTCTTCTTCC-3'<br>R-5' CTGGTAGTGCTGGGACAT-3'        | 60                           | 139                    | GQ85388              |
| OCT 4       | F, 5'-TTGCAGCTCAGTTTCAAG-3'<br>R, 5'-GTTGTTGTCAGCTTCCTC-3'        | 54                           | 75                     | EU926737             |
| NANOG       | F, 5'-CCGAAGCATCCA ACTCTAGG-3'<br>R, 5'-GAGACAGTGTC CGTGTGCGAG-3' | 60                           | 100                    | NM_001025344.1       |
| GAPDH       | F, 5'-TCAAGAAGGTGGTGAAGCAG-3'<br>R, 5'-CCCAGCATCGAAGGTAGAAG-3'    | 57                           | 121                    | GU324291.1           |

F, forward; R, reverse.
